# Supplementary material
Source: PubMed Central journal article supplement (PMC8380689)
Supplement: NIHMS1698024-supplement-Supplementary_Table_1.pdf [file NIHMS1698024-supplement-Supplementary_Table_1.pdf]

**Table 1.** Treatment paradigm and experimental timeline

| Group (No.)                              | Treatment                                    | Time of exposure to nicotine (1 mg/L) or water | Sacrifice (time) | From nicotine WDW:                                 |                 |                 |                 |                 |
|------------------------------------------|----------------------------------------------|------------------------------------------------|------------------|----------------------------------------------------|-----------------|-----------------|-----------------|-----------------|
|                                          |                                              |                                                |                  | 0 min                                              | Day 2           | Day 7           | Day 30          | Day 60          |
| <b>A</b><br>(10)<br>(10)                 | Nic<br>Water                                 | 7 days                                         | 5 min            | Binding studies                                    |                 |                 |                 |                 |
| (10)<br>(10)                             | Nic<br>Water                                 | 14 days                                        | 5 min            | Binding studies                                    |                 |                 |                 |                 |
| <b>B</b><br>(10)<br>(10)<br>(10)<br>(10) | Nic+veh<br>Nic+mec<br>Water+veh<br>Water+mec | 14 days                                        | 24 h             | Precipitated WDW<br>Freezing/<br>Swimming activity |                 |                 |                 |                 |
| <b>C</b><br>(10)<br>(10)                 | Nicotine<br>Water                            | 14 days                                        |                  | Spontaneous WDW                                    | ND              |                 | Preference test | VORT            |
| <b>D</b><br>(10)<br>(10)                 | Nicotine<br>Water                            | 14 days                                        |                  | Spontaneous WDW                                    |                 | VORT            | ND              | Preference test |
| <b>E</b><br>(10)<br>(10)                 | Nicotine<br>Water                            | 14 days                                        |                  | Spontaneous WDW                                    | Preference test | ND              | VORT            |                 |
| <b>F</b><br>(10)<br>(10)                 | Nicotine<br>Water                            | 14 days                                        |                  | Spontaneous WDW                                    | VORT            | Preference test |                 | ND              |

WDW= withdrawal syndrome; ND=Novel Object Recognition; VORT=Virtual Object Recognition test
