# Supplementary material
Source: PubMed Central journal article supplement (PMC8380689)
Supplement: NIHMS1698024-supplement-Supplementary_Table_2.pdf [file NIHMS1698024-supplement-Supplementary_Table_2.pdf]

**Supplementary Table 2.** Primer pairs for the genes examined in quantitative real-time PCR analysis.

| Type / Purpose                     | Common name                                                | Gene name                         | Primer name                    | ACCESSION NUMBER                                  | Sequence (5' to 3')                                           | Product size (bp) | Source                                                                                          |
|------------------------------------|------------------------------------------------------------|-----------------------------------|--------------------------------|---------------------------------------------------|---------------------------------------------------------------|-------------------|-------------------------------------------------------------------------------------------------|
| Housekeeping                       | actin, beta 2                                              | $\beta$ actin<br>( <i>actb2</i> ) | actin-F<br>actin-R             | NM_181601.5                                       | CGAGCTGTCTTCCCATCCA<br>TCACCAACGTAGCTGTCTT<br>TCTG            | 86                | <a href="https://doi.org/10.1111/1/adb.12176">https://doi.org/10.1111/1/adb.12176</a>           |
|                                    | ribosomal protein L13a                                     | RP1<br>( <i>rpl13a</i> )          | rpl-F<br>rpl-R                 | NM_212784.1                                       | TCTGGAGGACTGTAAGAG<br>GTATGC<br>AGACGCACAATCTTGAGAG<br>CAG    | 148               | <a href="https://doi.org/10.1111/1/adb.12176">https://doi.org/10.1111/1/adb.12176</a>           |
|                                    | eukaryotic translation elongation factor 1 alpha 1, like 1 | <i>ef1<math>\alpha</math></i>     | ef1-F<br>ef1-R                 | NM_131263.1                                       | CTGGAGGCCAGCTGAAAC<br>AT<br>ATCAAGAAGAGTAGTAC<br>CGCTAGCATTAC | 87                | <a href="https://doi.org/10.1111/1/adb.12176">https://doi.org/10.1111/1/adb.12176</a>           |
| Nicotinic receptors                | neuronal acetylcholine receptor subunit alpha-5            | <i>chrna4</i>                     | CHRNA4_qPCR_F<br>CHRNA4_qPCR_R | NM_001048063.1                                    | TTACAAGAGGTTTGGGCGC<br>T<br>ACAGACCAGTAGATCATCA<br>CTCC       | 90                | <a href="https://doi.org/10.1111/1/adb.12176">https://doi.org/10.1111/1/adb.12176</a>           |
|                                    | neuronal acetylcholine receptor subunit alpha-6            | <i>chrna6</i>                     | CHRNA6_qPCR_F<br>CHRNA6_qPCR_R | NM_001042684                                      | AGGCTCTTTCGTCGTTTATT<br>C<br>TCTCAGCCAAAGGTTTGT<br>TC         | 156               | <a href="https://doi.org/10.7554/eLife.51295">https://doi.org/10.7554/eLife.51295</a>           |
|                                    | neuronal acetylcholine receptor subunit alpha-7            | <i>chrna7</i>                     | CHRNA7_qPCR_F<br>CHRNA7_qPCR_R | ENSDART00000171463.3<br>&<br>ENSDART00000166391.2 | ACCGTGTCACATTGTTTCATT<br>CTC<br>ACAGGTCTCTCCAGTGGGT<br>TA     | 105               | <a href="https://doi.org/10.7554/eLife.51295">https://doi.org/10.7554/eLife.51295</a>           |
| Serotonin receptor and transporter | 5hydroxytryptamine receptor 1a (5-HT1a)                    | <i>htr1aa</i>                     | htr1aa_qpcr_F<br>htr1aa_qpcr_R | NM_001123321.1                                    | GGAGCCCCGCATGCGTCTT<br>CGTCGCGTCCCGCTCCAA                     | 118               | <a href="https://doi.org/10.3389/fnbeh.2015.00271">https://doi.org/10.3389/fnbeh.2015.00271</a> |
|                                    | 5hydroxytryptamine receptor 2 (5-HT2)                      | <i>htr2a</i>                      | htr2a_qpcr_F                   | XM_684208.9                                       | TACGGTGGCTGGGAACATTTAG                                        | 187               | <a href="https://doi.org/10.1038/srep33822">https://doi.org/10.1038/srep33822</a>               |

|                              |                                                                                 |                           |                            |                 |                                                         |     |                                                                                                         |
|------------------------------|---------------------------------------------------------------------------------|---------------------------|----------------------------|-----------------|---------------------------------------------------------|-----|---------------------------------------------------------------------------------------------------------|
|                              |                                                                                 |                           | htr2a_qpcr_F               |                 | GGGACACAGTGATGCAGG<br>GAAA                              |     |                                                                                                         |
|                              | Serotonergic<br>Transporter<br>(Sert)                                           | <i>slc6a4a</i>            | Sert-qPCR-F<br>Sert-qPCR-R | NM_001039972.1  | ACCAGGGGCGAAGCCAAG<br>CA<br>GCCACAGGCCCGCTGTTA          | 117 | <a href="https://doi.org/10.3389/fnbeh.2015.00271">https://doi.org/10.3389/fnbeh.2015.00271</a>         |
| Immediate early genes (IEGs) | Danio rerio v-fos<br>FBJ murine<br>osteosarcoma<br>viral oncogene<br>homolog Ab | cFos<br>( <i>fosab</i> )  | cFos-qPCR-F<br>cFos-qPCR-R | NM_205569.1     | CAGCTCCACCACAGTGAAG<br>A<br>GCTCCAGGTCAGTGTTAGC<br>C    | 176 | <a href="https://doi.org/10.1371/journal.pone.0086176">https://doi.org/10.1371/journal.pone.0086176</a> |
|                              | cyclin-dependent<br>Kinase 5                                                    | <i>cdk5</i>               | cdk5-qPCR-F<br>cdk5-qPCR-R | GCF_000002035.6 | GGCTGAAACCATGCAAAA<br>GT<br>ATTCAGGCCAGACAGTGCT<br>T    | 73  | <a href="https://doi.org/10.2337/db16-1587">https://doi.org/10.2337/db16-1587</a>                       |
|                              | cyclin-dependent<br>kinase 5,<br>regulatory<br>subunit 1b (p35)                 | p35<br>( <i>cdk5r1b</i> ) | p35-qPCR-F<br>p35-qPCR-R   | NM_001002515.3  | GCGGCTCTTGTTTTGCTAA<br>A<br>GCTTCCTGAGACTAGTTCA<br>ATCT | 150 | <a href="https://doi.org/10.1002/dvdy.24061">https://doi.org/10.1002/dvdy.24061</a>                     |
